# Supplementary material
Source: MDPI journal article supplement (https://www.mdpi.com/1999-4907/11/3/273)
Supplement: s1 [file s1]

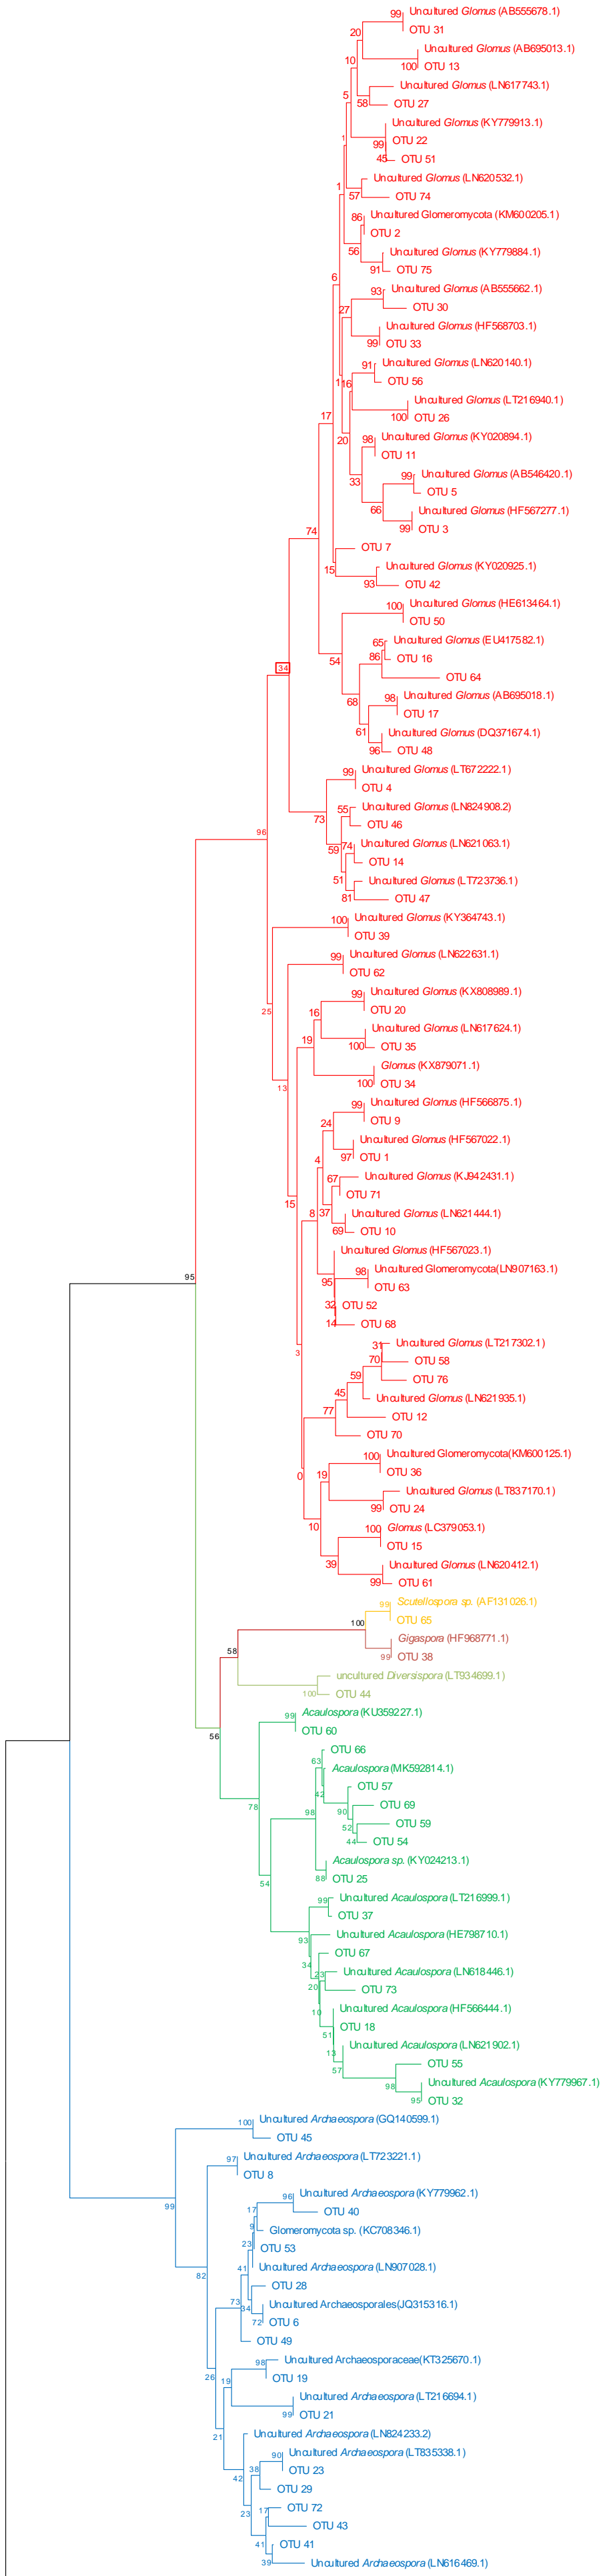

*Glomus*

Glomeraceae

*Scutellospora*

Gigasporaceae

*Gigaspora*

*Diversispora*

Diversisporaceae

*Acaulospora*

Acaulosporaceae

*Archaeospora*

Archaeosporaceae
